# Supplementary material for: GmTCP and GmNLP Underlying Nodulation Character in Soybean Depending on Nitrogen
Source: MDPI journal article supplement (doi:10.3390/ijms24097750), 2023-04-24
Supplement: s1 [file s1]

Table S1 Primers for this research

|              |                                |             |                                                  |
|--------------|--------------------------------|-------------|--------------------------------------------------|
| CRISPR-TCP-F | GGATTGTGCTGTTGATGGATC<br>CCAA  | pSOY1-TCP-F | ATGGATCCCAAGGGCTCAAAGCA                          |
| CRISPR-TCP-R | AAACTTGGGATCCATCAACA<br>GCACA  | pSOY1-TCP-R | CTACTGTCCTCCTGAGCCTTGAGA<br>ATCA                 |
| CRISPR-NLP-F | GGATTGCTAATATCGCCACCG<br>CCGAG | pSOY1-NLP-F | ATGGAGAAGGGTAGAACCGTGGT<br>GG                    |
| CRISPR-NLP-R | AAACCTCGGCGGTGGCGATAT<br>TAGCA | pSOY1-NLP-R | TCATTGGACGGGATTGTTGCCAT                          |
| Crispr-F     | ggcgggaaacgacaatctgatc         | TCP-pro-F   | gtacccggggatcctctagaCCAAGTCTCGA<br>AAAGCGTCCA    |
| qRT-TCP-F    | CTGAGATCGGTTTGTGTTTGTG<br>A    | TCP-pro-R   | taccctcagatctaccatggCAACAGCACAC<br>AAAAGAAAAGAGG |
| qRT-TCP-R    | TAACTTGCAAGTGATGTTCC<br>AC     | pCAMBIA F   | CCATGGTAGATCTGAGGGTAAATT<br>T                    |
| qRT-NLP-F    | CGAGGCAACAAGGAAACAAT<br>AA     | pCAMBIA R   | TCTAGAGGATCCCCGGGTACC                            |
| qRT-NLP-R    | TGAATCAGAATGATGTTTCGC<br>AC    | qRT-UNK1-R  | GGTGGAAGGAACTGCTAACAAT                           |
| qRT-UNK1-F   | TGGTGCTGCCGCTATTTACTG          |             |                                                  |

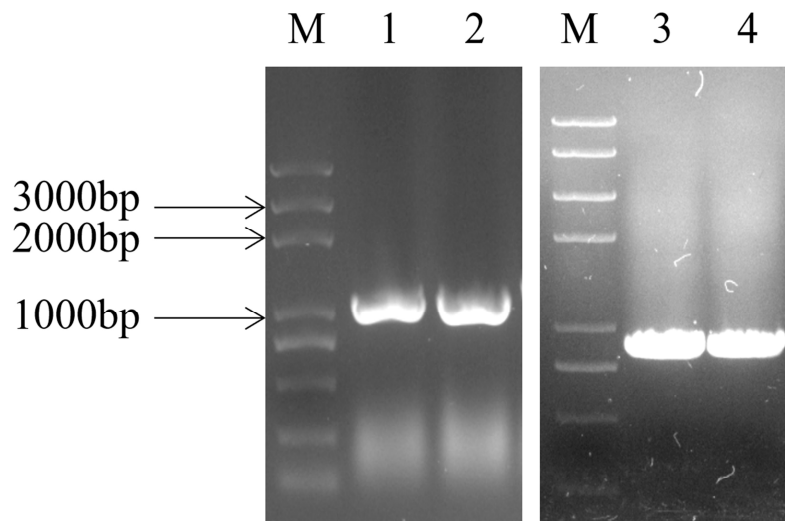Figure S1. PCR analysis of *pSOY1-Glyma.19G095300*, *pSOY1-Glyma.12G185700* recombinant vector for plant expression.

Note: M: Trans 2K Plus DNA marker; 1, 2: *Glyma.19G095300* (pSOY1-TCP-F/R); 3, 4: *Glyma.12G185700* (pSOY1-NLP-F/R)

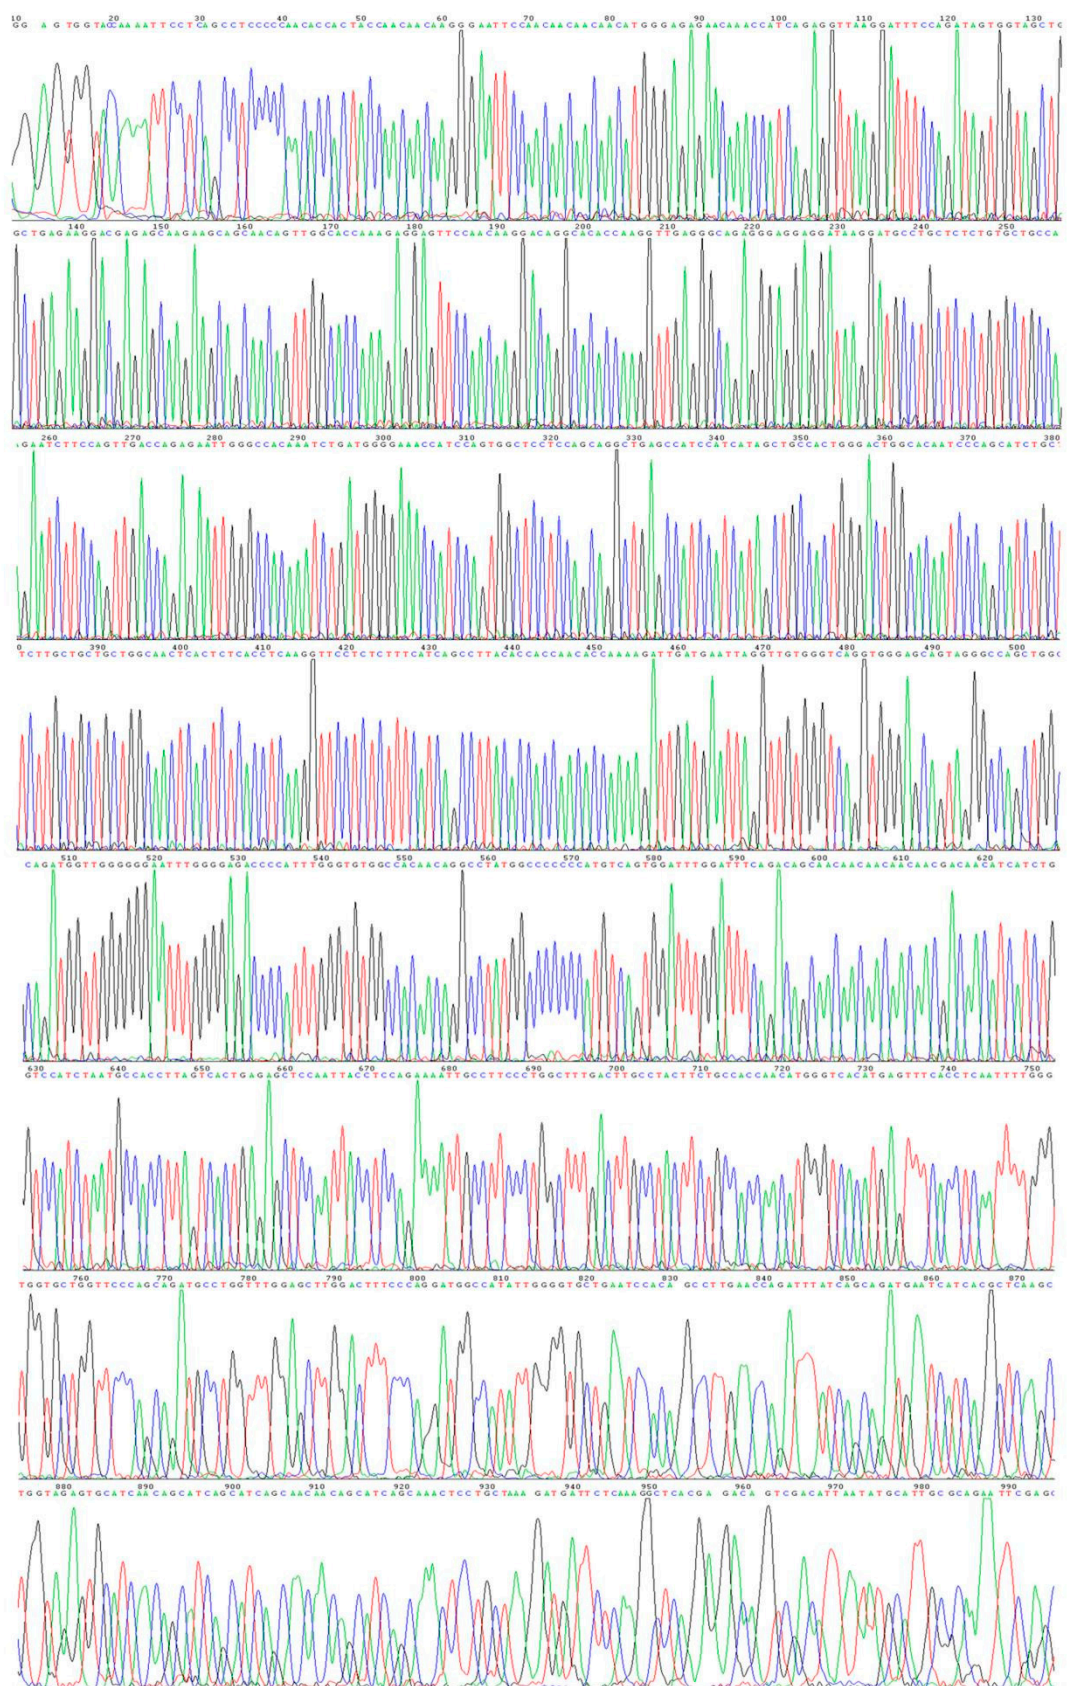



expression with forward-specific primer.

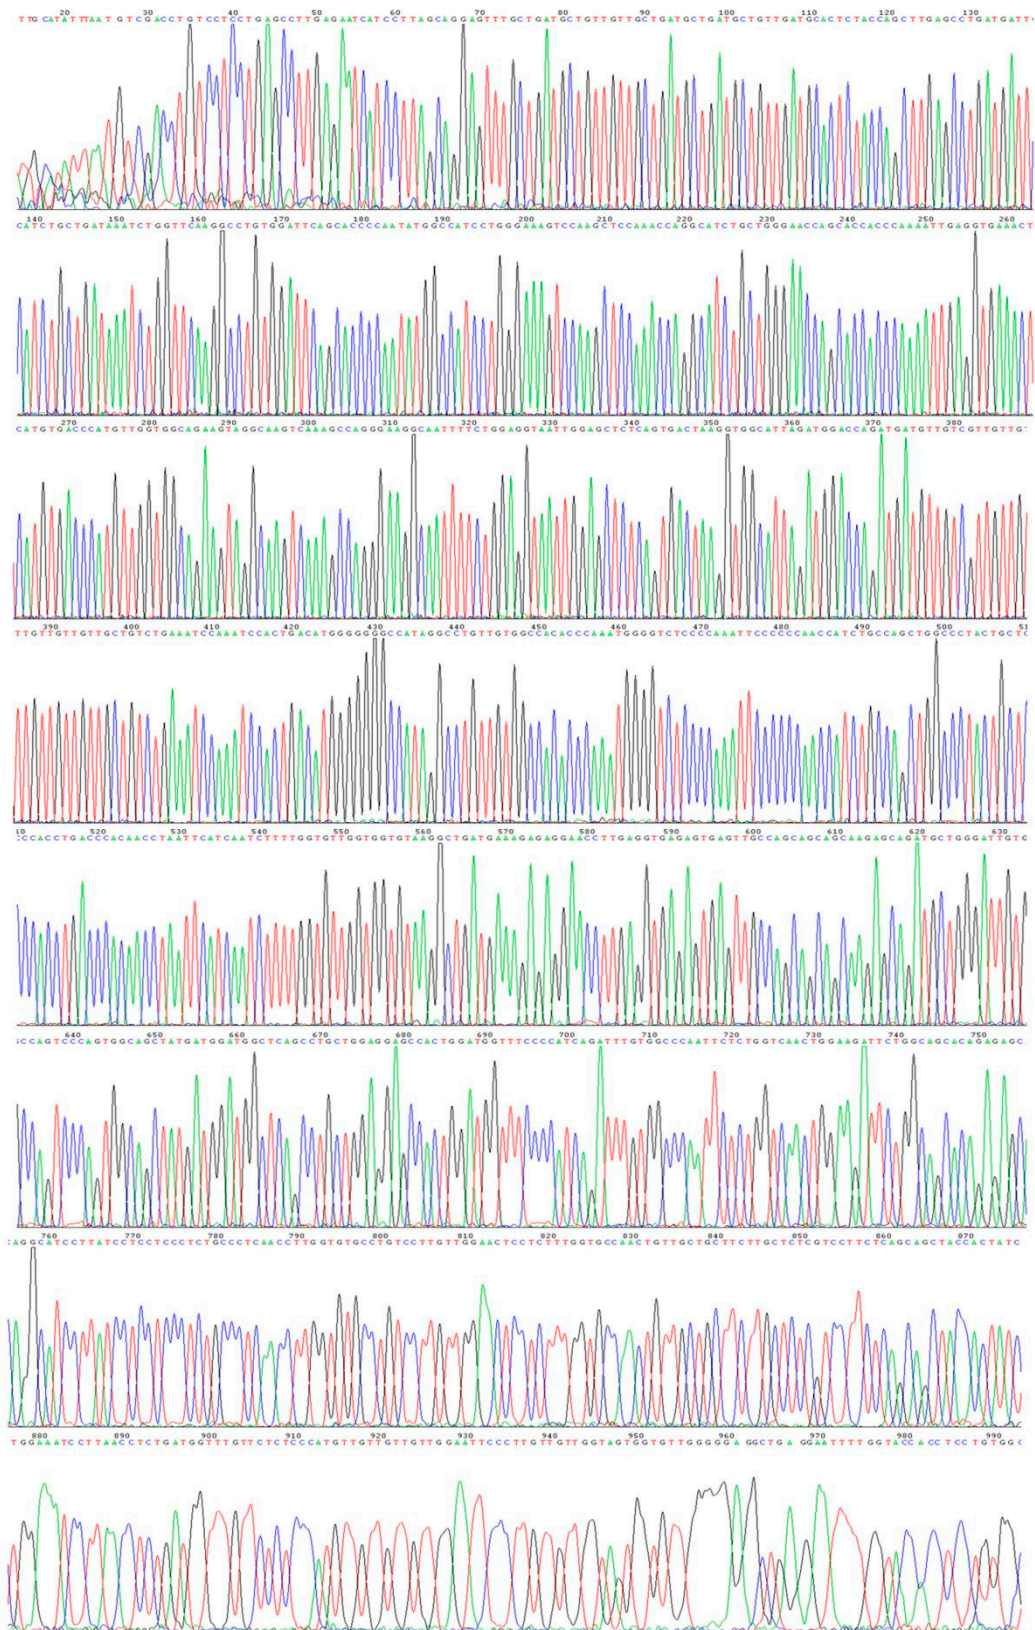

Figure S3. Sequencing of target gene from *pSOY1-Glyma.19G095300* recombinant vector for plant expression with reverse-specific primer.

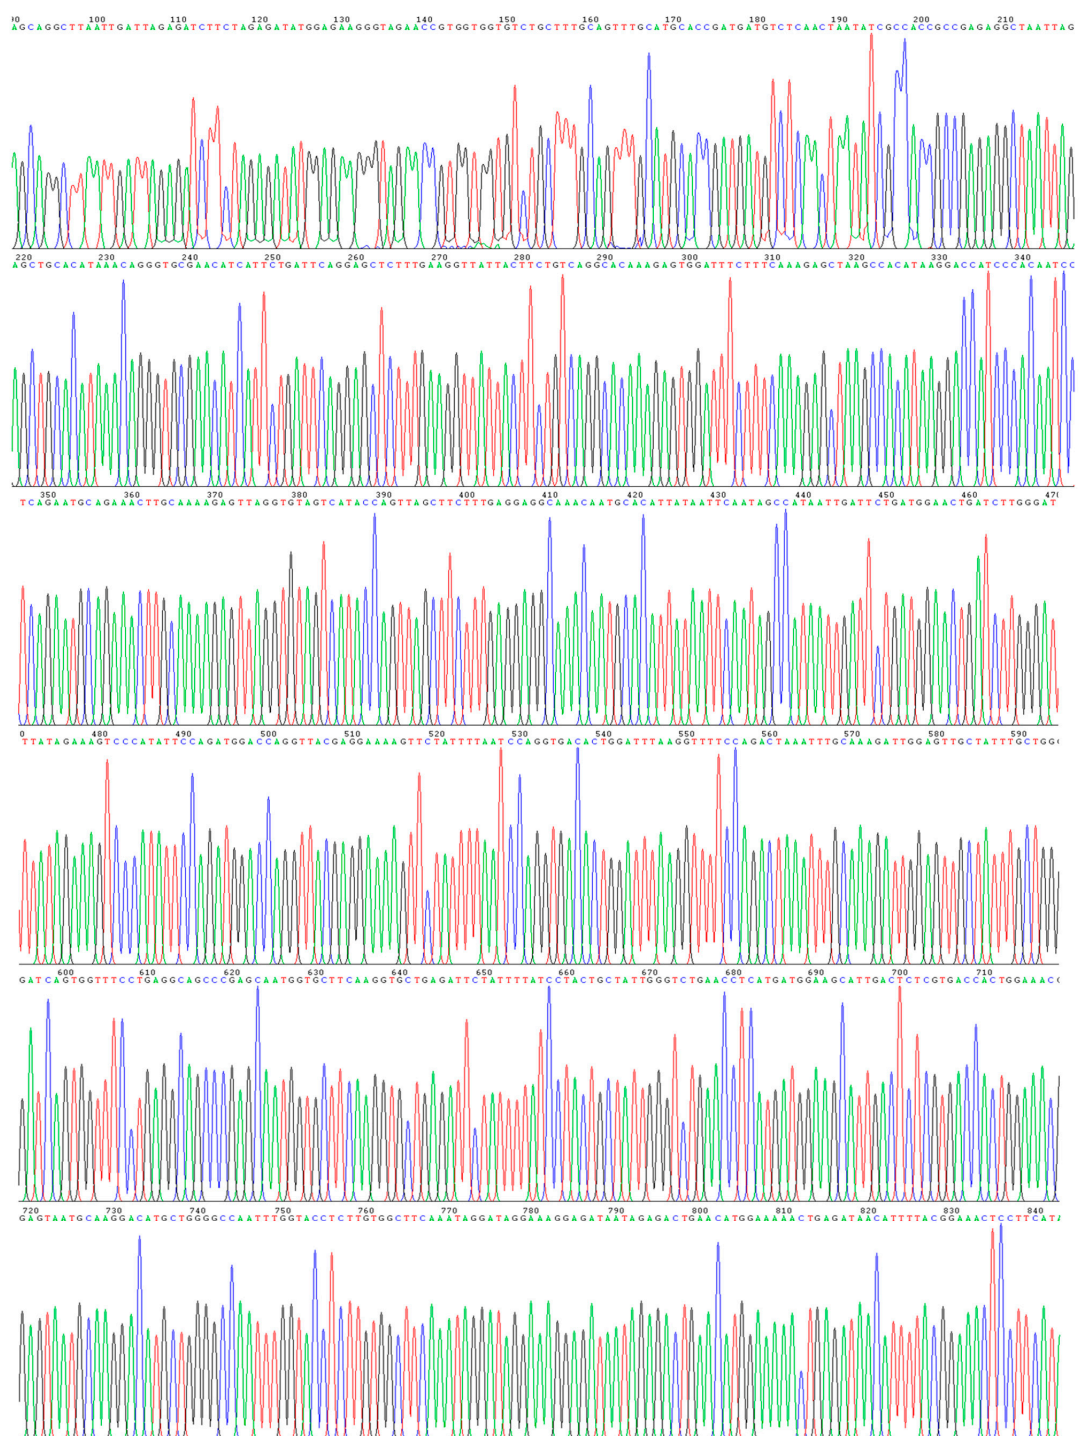

Figure S4. Sequencing of target gene from *pSOY1-Glyma.12G185700* recombinant vector for plant expression with forward-specific primer.



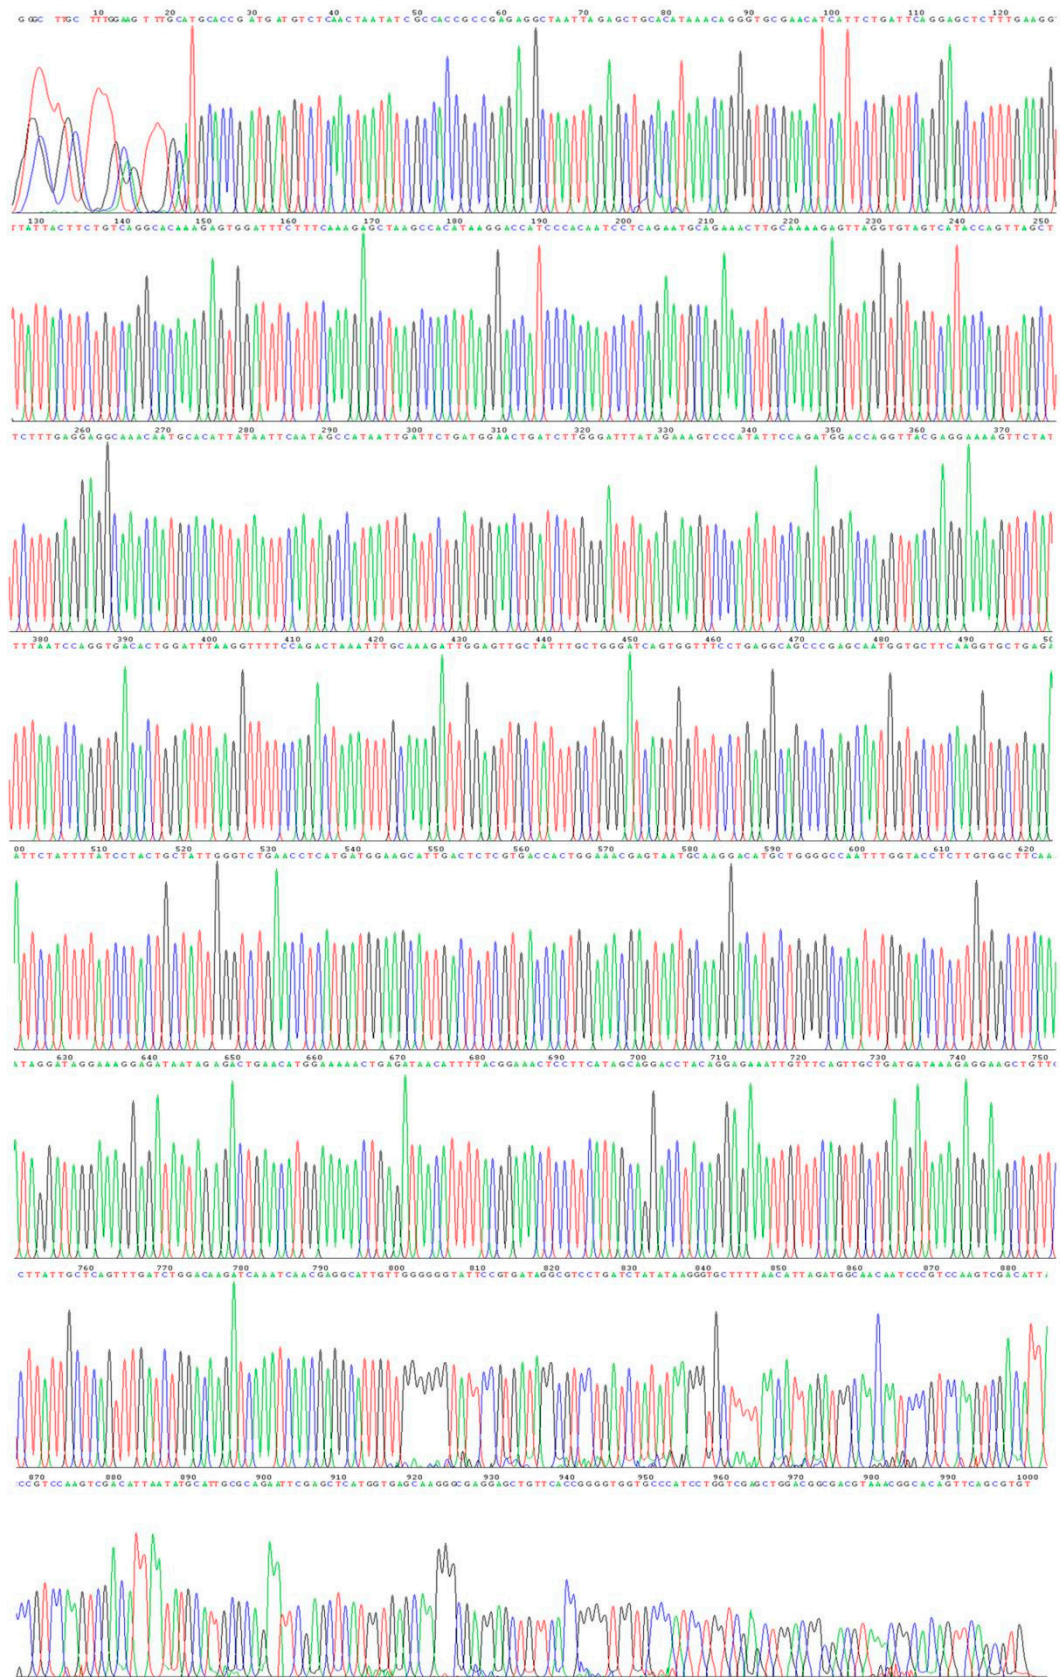

Figure S5. Sequencing of target gene from *pSOY1-Glyma.12G185700* recombinant vector for plant expression with reverse-specific primer.

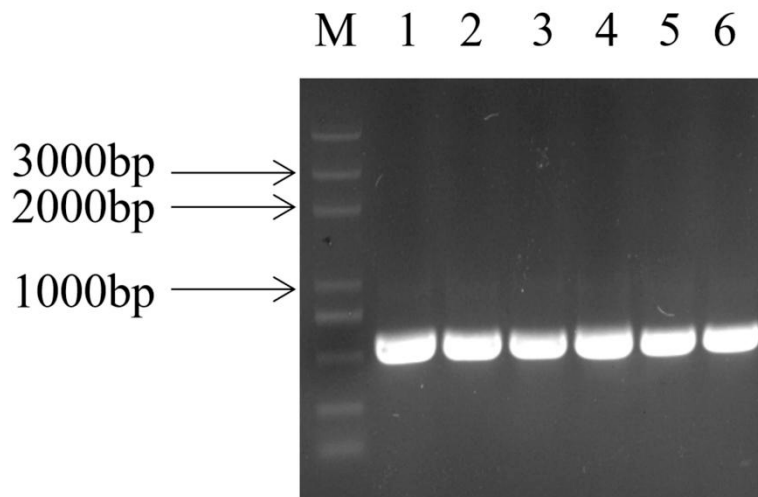

Figure S6. PCR analysis of *pGES201-Glyma.19G095300*, *pGES201-Glyma.12G185700* recombinant vector for CRISPR-Cas9 gene-editing.

Note: M: Trans 2K Plus DNA marker; 1, 2, 3: *Glyma.19G095300* (Crispr-F/CRISPR-TCP-R); 4, 5, 6: *Glyma.12G185700* (Crispr-F/CRISPR-NLP-R)

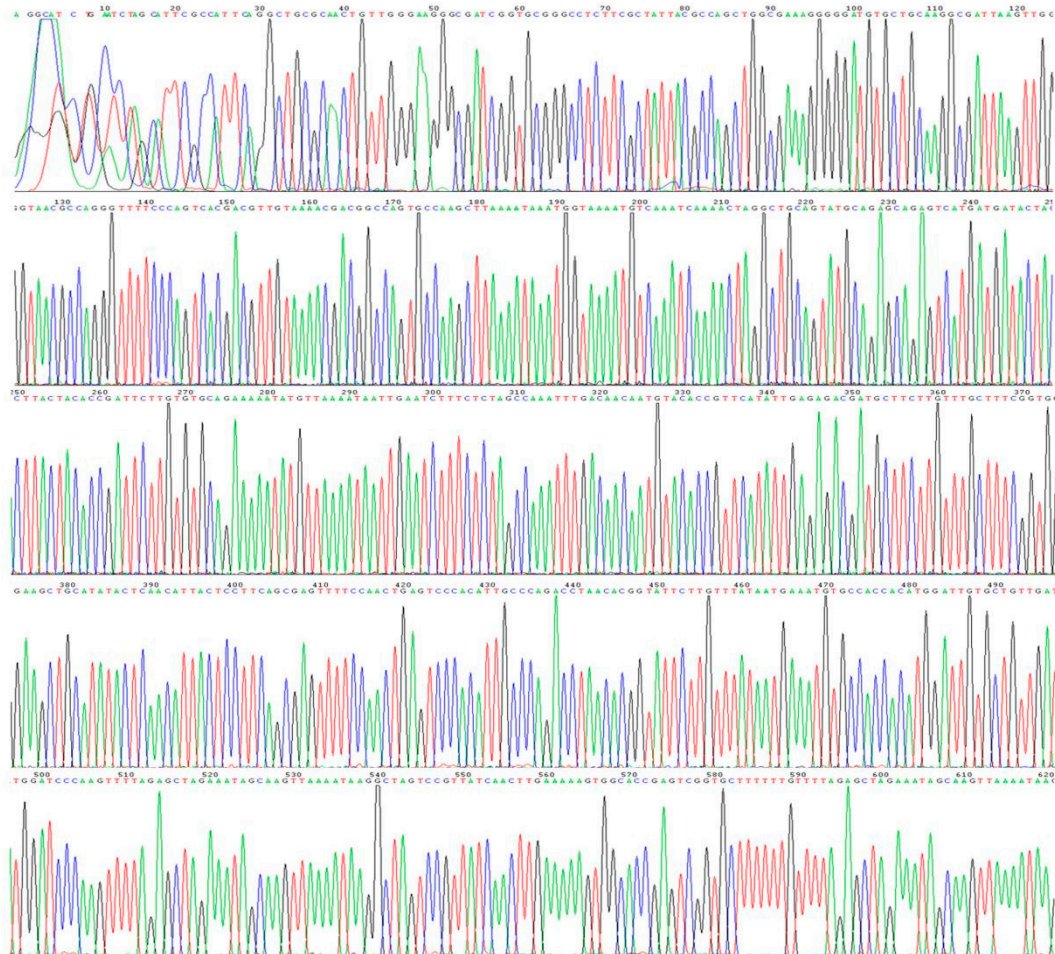

Figure S7. Sequencing of target sequence from *pGES201-Glyma.19G095300* recombinant vector.







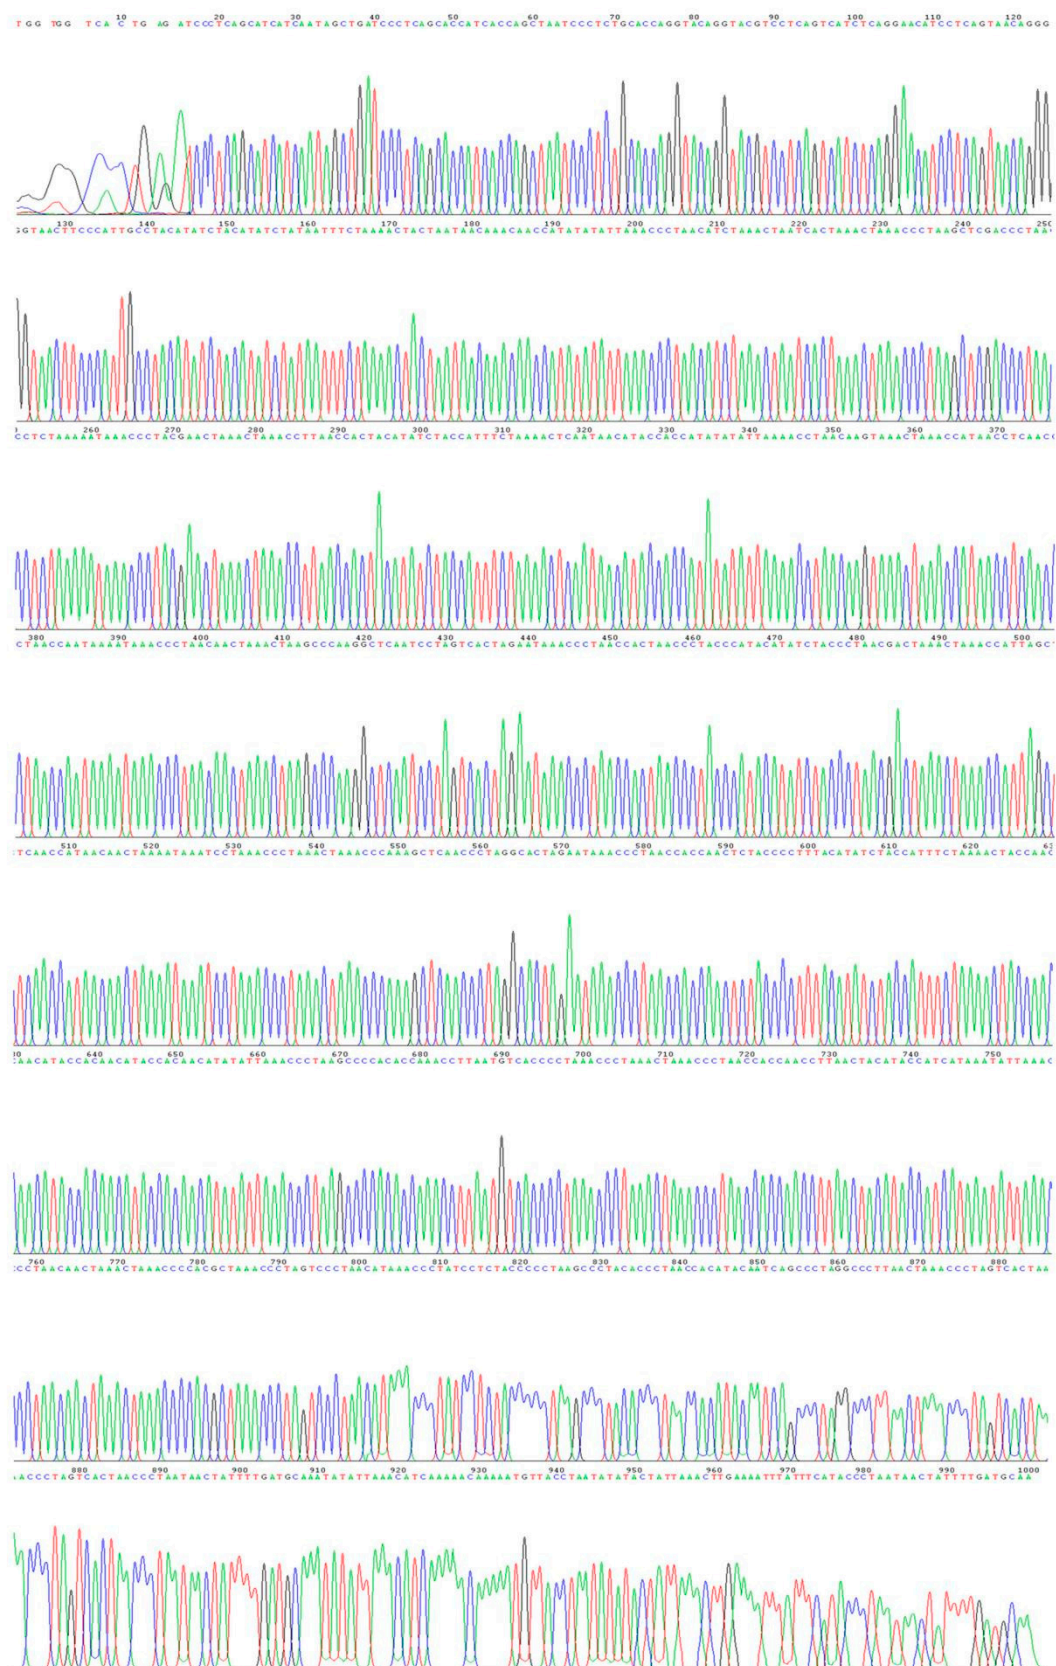

Figure S10. Sequencing of promoter sequence from *pCAMBIA-Glyma.19G095300pro: GUS* recombinant vector with forward-specific primer.
